# Supplementary material
Source: MDPI journal article supplement (https://www.mdpi.com/2073-4352/12/1/5)
Supplement: s1 [file s1]

## Article

# [3+2] Cycloaddition Reaction for the Stereoselective Synthesis of a New Spirooxindole Compound Grafted Imidazo[2,1-*b*]thiazole Scaffold: Crystal Structure and Computational Study

Mezna Saleh Altowyan <sup>1</sup>, Saied M. Soliman <sup>2</sup>, Matti Haukka <sup>3</sup>, Nora Hamad Al-Shaalan <sup>1</sup>, Alkharboush A. Aminah <sup>1</sup> and Assem Barakat <sup>4,\*</sup>

<sup>1</sup> Department of Chemistry, College of Science, Princess Nourah Bint Abdulrahman University, P.O. Box 84428, Riyadh 11671, Saudi Arabia; msaltowyan@pnu.edu.sa (M.S.A.); nhalshaalan@pnu.edu.sa (N.H.A.-S.); Amina84w@gmail.com (A.A.A.)

<sup>2</sup> Department of Chemistry, Faculty of Science, Alexandria University, P.O. Box 426, Ibrahimia, Alexandria 21321, Egypt; saied1soliman@yahoo.com

<sup>3</sup> Department of Chemistry, University of Jyväskylä, P.O. Box 35, FI-40014 Jyväskylä, Finland; matti.o.haukka@jyu.fi

<sup>4</sup> Department of Chemistry, College of Science, King Saud University, P.O. Box 2455, Riyadh 11451, Saudi Arabia

\* Correspondence: ambarakat@ksu.edu.sa; Tel.: +966-11467-5901; Fax: +966-11467-5992

**Citation:** Altowyan, M.S.; Soliman, S.M.; Haukka, M.; Al-Shaalan, N.H.; Aminah, A.A.; Barakat, A. [3+2] Cycloaddition Reaction for the Stereoselective Synthesis of a New Spirooxindole Compound Grafted Imidazo[2,1-*b*]thiazole Scaffold: Crystal Structure and Computational Study. *Crystals* **2022**, *12*, 5. <https://doi.org/10.3390/cryst12010005>

Academic Editor: Scott J. Dalgarno

Received: 1 December 2021

Accepted: 17 December 2021

Published: 21 December 2021

**Publisher's Note:** MDPI stays neutral with regard to jurisdictional claims in published maps and institutional affiliations.

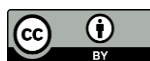

**Copyright:** © 2021 by the authors. Licensee MDPI, Basel, Switzerland. This article is an open access article distributed under the terms and conditions of the Creative Commons Attribution (CC BY) license (<https://creativecommons.org/licenses/by/4.0/>).

## Supplementary data

### General

All chemical and reagents obtained from commercial suppliers (sigma Aldrich and TCI companies) were used without further purification. Reactions were monitored by thin layer chromatography using Merck silica gel 60 Kieselgel F254 TLC (Merck, Kenilworth, NJ, USA), and column chromatography was performed on silica gel 100–200 (40–63  $\mu$ m, ASTM) from Merck using the indicated solvents. <sup>1</sup>H and <sup>13</sup>C-NMR spectra were recorded in CDCl<sub>3</sub> on a Jeol Spectrometer (Jeol, Tokyo, Japan) (400 MHz). The chemical shifts are reported in ppm. Infrared spectra were recorded on a Thermo Scientific Nicolet iS10 FT-IR spectrometer (Thermo Fisher Scientific, Waltham, MA, USA). Melting points (m.p.) were recorded on a Thomas-Hoover capillary melting point apparatus (Thomas-Hoover, Texas City, USA) and were not corrected. Elemental analyses were performed on Perkin-Elmer PE 2400 CHN Elemental Analyzer with autosampler, CHN mode. X-ray diffraction data were collected on a Rigaku Oxford Diffraction Supernova diffractometer and processed with CrysAlisPro software v. 1.171.41.93a (Rigaku Oxford Diffraction, Yarnton, UK, 2020) using Cu K $\alpha$  radiation.

#### 1. X-Ray single crystal measurements of **4**

The crystal of **4** was immersed in cryo-oil, mounted in a loop, and measured at a temperature of 120 K. The X-ray diffraction data was collected on a Rigaku Oxford Diffraction Supernova diffractometer using Cu K $\alpha$  radiation. The CrysAlisPro<sup>1</sup> software package was used for cell refinement and data reduction. A multi-scan absorption correction (CrysAlisPro<sup>1</sup>) was applied to the intensities before structure solution. The structure was solved by intrinsic phasing (SHELXT<sup>2</sup>) method. Structural refinement was carried out using SHELXL<sup>3</sup> software with SHELXLE<sup>4</sup> graphical user interface. The NH hydrogen atom was located from the difference Fourier map and refined isotropically. All other hydrogen atoms were positioned geometrically and constrained to ride on their parent atoms, with C-H = 0.95–0.99 Å and U<sub>iso</sub> = 1.2 · U<sub>eq</sub>(parent atom).

## 2. Hirshfeld surface analysis

The topology analyses were performed using Crystal Explorer 17.5 program [5].

## 3. Computational methods

All DFT calculations were performed using Gaussian 09 software package [6] utilizing B3LYP/6-31G(d,p) method. Natural charge calculations were performed using NBO 3.1 program as implemented in the Gaussian 09W package [7]. The self-consistent reaction field (SCRF) method [8, 9] was used to model the solvent effects when calculated the optimized geometries in solution. Then the NMR chemical shifts for the protons and carbons were computed using GIAO method [10]. Also, the UV-Vis electronic spectra of the compound were calculated using TD-DFT method.

## References

1. Rikagu Oxford Diffraction. *CrysAlisPro*; Agilent Technologies inc.: Yarnton, Oxfordshire, UK, 2018.
2. Sheldrick, G. M. ShelXT-Integrated space-group and crystal-structure determination. *Acta Cryst.* **2015**, *A71*, 3–8.
3. Sheldrick, G.M. SHELXT-Integrated space-group and crystal-structure determination. *Acta Cryst.* **2015**, *C71*, 3–8.
4. Hübschle, C.B.; Sheldrick, G.M.; Dittrich, B. ShelXle: A Qt graphical user interface for SHELXL. *J. Appl. Cryst.* **2011**, *44*, 1281–1284.
5. Turner, M. J.; McKinnon, J. J.; Wolff, S. K.; Grimwood, D. J.; Spackman, P. R.; Jayatilaka, D.; Spackman, M. A. Crystal Explorer17 (2017) University of Western Australia. <http://hirshfeldsurface.net>
6. Frisch, M.J.; Trucks, G.W.; Schlegel, H.B.; Scuseria, G.E.; Robb, M.A.; Cheeseman, J.R.; Scalmani, G.; Barone, V.; Mennucci, B.; Petersson, G.A.; *et al.* GAUSSIAN 09; Revision A02; Gaussian Inc.: Wallingford, CT, USA, 2009; GaussView; Version 4.1; Dennington II, R., Keith, T., Millam, J., Eds.; Semichem Inc.: Shawnee Mission, KS, USA, 2007.
7. Reed, A.E.; Curtiss, L.A.; Weinhold, F. Intermolecular interactions from a natural bond orbital, donor-acceptor viewpoint. *Chem. Rev.* **1988**, *88*, 899–926.
8. Marten, B.; Kim K.; Cortis, C.; Friesner, R. A.; Murphy, R. B.; Ringnalda, M. N.; Sitkoff, D.; Honig, B. New Model for Calculation of Solvation Free Energies: Correction of Self-Consistent Reaction Field Continuum Dielectric Theory for Short-Range Hydrogen-Bonding Effects, *J. Phys. Chem.* **1996** *100* 11775–11765.
9. Tannor, D.J.; Marten, B.; Murphy, R.; Friesner, R.A.; Sitkoff, D.; Nicholls, A.; Ringnalda, M.; Goddard, W.A.; Honig, B. Accurate first principles calculation of molecular charge distributions and solvation energies from ab initio quantum mechanics and continuum dielectric theory. *J. Am. Chem. Soc.* **1994**, *116*, 11875–11882.
10. Cheeseman, J.R.; Trucks, G.W.; Keith, T.A.; Frisch, M.J. A Comparison of Models for Calculating Nuclear Magnetic Resonance Shielding Tensors. *J. Chem. Phys.* **1996**, *104*, 5497–5509.

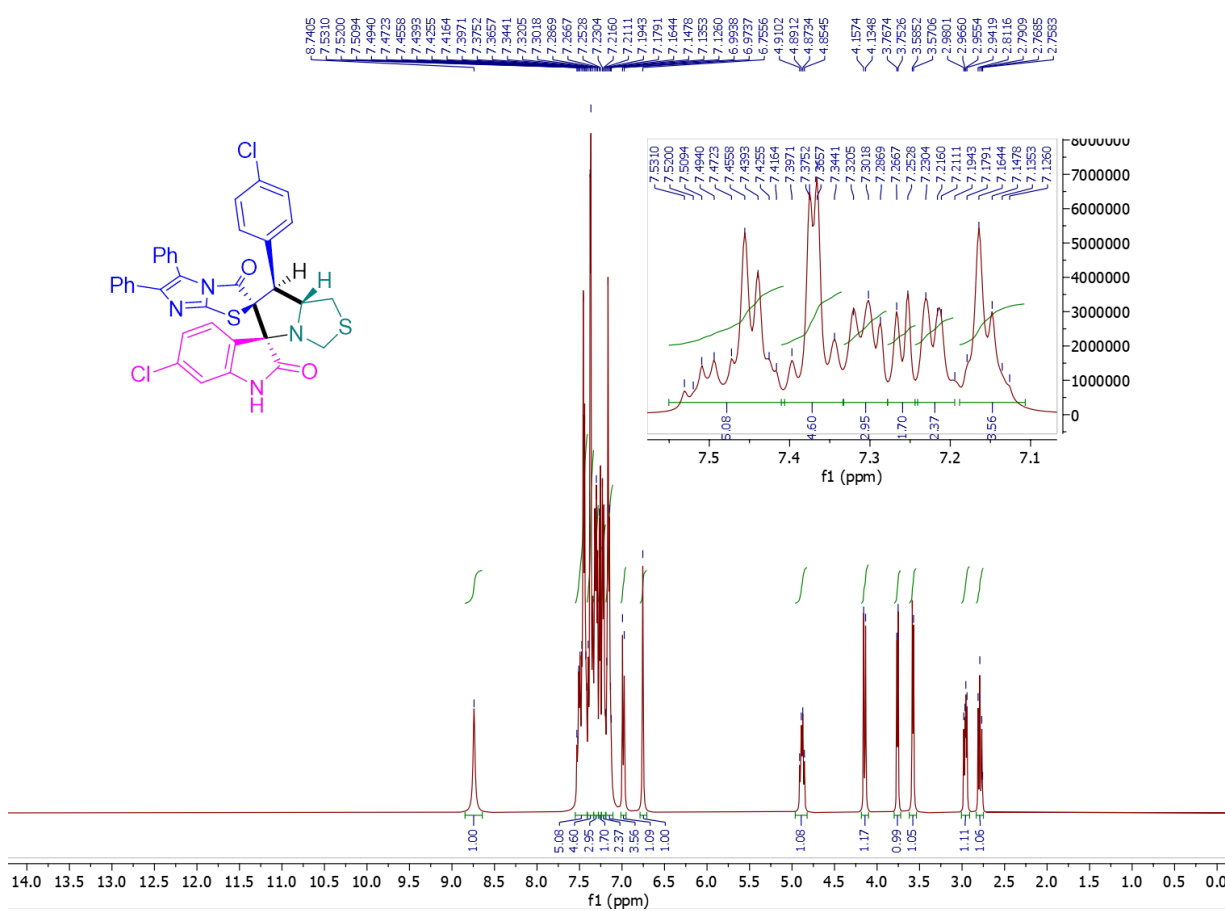

Figure S1: <sup>1</sup>H NMR spectrum for the synthesized compound 4.

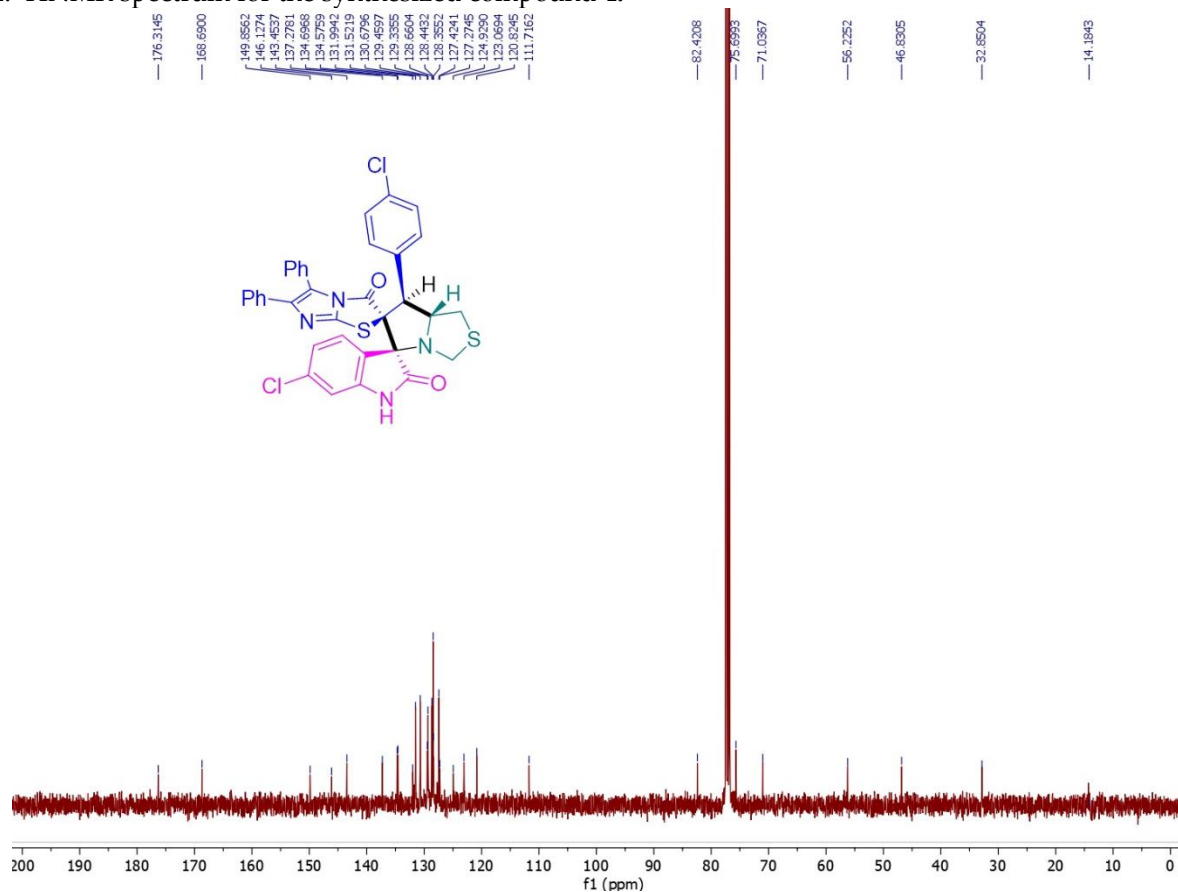

Figure S2:  $^{13}\text{C}$ -NMR spectrum for the synthesized compound 4.

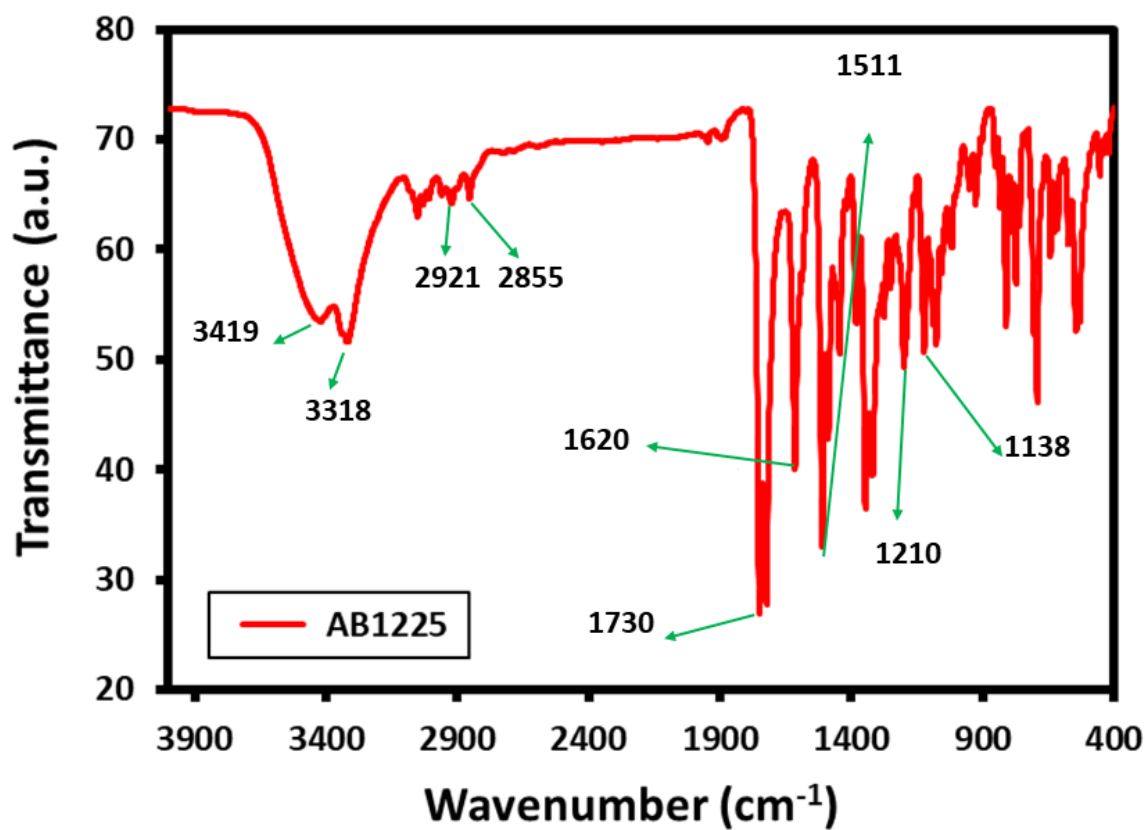

Figure S3: IR spectrum for the synthesized compound 4.

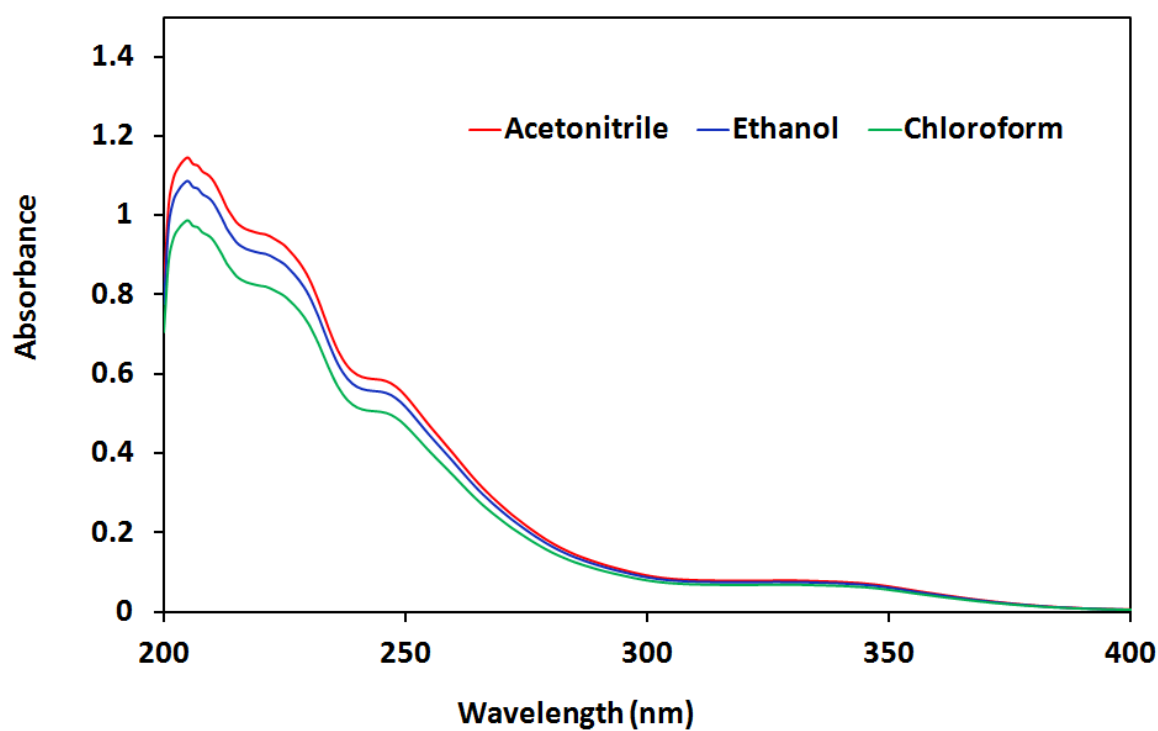

Figure S4. Electronic spectra of 4 in different solvents.

**Table S1** The calculated geometric parameters of 4<sup>a</sup>.

| Parameter | Calc  | Exp   | Parameter  | Calc    | Exp     |
|-----------|-------|-------|------------|---------|---------|
| R(1-15)   | 1.759 | 1.744 | A(1-15-13) | 119.536 | 119.010 |
| R(2-36)   | 1.756 | 1.737 | A(1-15-16) | 119.503 | 119.406 |
| R(3-25)   | 1.855 | 1.846 | A(2-36-34) | 118.381 | 118.035 |
| R(3-28)   | 1.861 | 1.828 | A(2-36-37) | 119.252 | 118.996 |
| R(4-42)   | 1.864 | 1.840 | A(25-3-28) | 92.683  | 93.412  |
| R(4-68)   | 1.755 | 1.741 | A(3-25-23) | 104.037 | 105.048 |
| R(5-32)   | 1.219 | 1.222 | A(3-25-26) | 109.100 | 110.742 |
| R(6-43)   | 1.212 | 1.198 | A(3-25-27) | 109.299 | 110.735 |
| R(7-23)   | 1.459 | 1.473 | A(3-28-7)  | 103.680 | 101.817 |
| R(7-28)   | 1.449 | 1.449 | A(3-28-29) | 110.163 | 111.425 |
| R(7-31)   | 1.448 | 1.467 | A(3-28-30) | 108.282 | 111.420 |
| R(8-32)   | 1.374 | 1.352 | A(42-4-68) | 90.568  | 91.240  |
| R(8-33)   | 1.401 | 1.404 | A(4-42-21) | 116.502 | 117.525 |
| R(9-43)   | 1.388 | 1.387 | A(4-42-31) | 111.865 | 111.523 |
| R(9-44)   | 1.415 | 1.406 | A(4-42-43) | 106.197 | 106.660 |
| R(9-68)   | 1.383 | 1.376 | A(4-68-9)  | 113.963 | 113.691 |
| R(10-56)  | 1.407 | 1.417 | A(4-68-10) | 132.688 | 132.977 |
| R(10-68)  | 1.292 | 1.294 | A(5-32-8)  | 125.693 | 126.909 |
| R(11-13)  | 1.394 | 1.393 | A(5-32-31) | 126.949 | 125.358 |
| R(11-20)  | 1.404 | 1.402 | A(6-43-9)  | 125.593 | 125.532 |
| R(13-15)  | 1.394 | 1.378 | A(6-43-42) | 123.710 | 124.091 |
| R(15-16)  | 1.392 | 1.372 | A(23-7-28) | 110.687 | 108.879 |
| R(16-18)  | 1.395 | 1.393 | A(23-7-31) | 109.413 | 105.299 |
| R(18-20)  | 1.400 | 1.392 | A(7-23-21) | 103.040 | 99.914  |
| R(20-21)  | 1.514 | 1.508 | A(7-23-24) | 111.893 | 109.793 |
| R(21-23)  | 1.545 | 1.538 | A(7-23-25) | 104.176 | 106.551 |
| R(21-42)  | 1.589 | 1.589 | A(28-7-31) | 122.133 | 119.579 |
| R(23-25)  | 1.527 | 1.527 | A(7-28-29) | 111.156 | 111.402 |
| R(31-32)  | 1.575 | 1.563 | A(7-28-30) | 113.667 | 111.394 |
| R(31-41)  | 1.520 | 1.515 | A(7-31-32) | 113.226 | 111.328 |
| R(31-42)  | 1.605 | 1.579 | A(7-31-41) | 114.108 | 112.983 |
| R(33-34)  | 1.388 | 1.386 | A(7-31-42) | 100.680 | 99.778  |
| R(33-41)  | 1.404 | 1.394 | A(32-8-33) | 112.329 | 110.914 |
| R(34-36)  | 1.399 | 1.387 | A(32-8-69) | 122.063 | 120.788 |
| R(36-37)  | 1.394 | 1.387 | A(8-32-31) | 107.298 | 107.704 |
| R(37-39)  | 1.401 | 1.396 | A(33-8-69) | 125.536 | 124.252 |
| R(39-41)  | 1.389 | 1.389 | A(8-33-34) | 127.807 | 126.482 |
| R(42-43)  | 1.555 | 1.541 | A(8-33-41) | 109.701 | 110.423 |
| R(44-45)  | 1.476 | 1.478 | A(43-9-44) | 136.903 | 135.910 |

|          |       |       |             |         |         |
|----------|-------|-------|-------------|---------|---------|
| R(44-56) | 1.384 | 1.368 | A(43-9-68)  | 116.543 | 116.199 |
| R(45-46) | 1.404 | 1.391 | A(9-43-42)  | 110.697 | 110.329 |
| R(45-54) | 1.405 | 1.397 | A(44-9-68)  | 106.554 | 106.907 |
| R(46-48) | 1.394 | 1.387 | A(9-44-45)  | 123.421 | 121.021 |
| R(48-50) | 1.396 | 1.382 | A(9-44-56)  | 103.934 | 104.113 |
| R(50-52) | 1.396 | 1.391 | A(9-68-10)  | 113.314 | 113.315 |
| R(52-54) | 1.394 | 1.386 | A(56-10-68) | 104.952 | 104.172 |
| R(56-57) | 1.472 | 1.473 | A(10-56-44) | 111.239 | 111.492 |
| R(57-58) | 1.406 | 1.393 | A(10-56-57) | 118.623 | 119.586 |
| R(57-66) | 1.406 | 1.398 | A(13-11-20) | 120.929 | 120.096 |
| R(58-60) | 1.393 | 1.393 | A(11-13-15) | 119.380 | 119.556 |
| R(60-62) | 1.396 | 1.387 | A(11-20-18) | 118.341 | 118.740 |
| R(62-64) | 1.396 | 1.380 | A(11-20-21) | 122.264 | 123.061 |
| R(64-66) | 1.393 | 1.393 | A(13-15-16) | 120.961 | 121.560 |
|          |       |       | A(15-16-18) | 118.944 | 119.005 |
|          |       |       | A(16-18-20) | 121.444 | 121.017 |
|          |       |       | A(18-20-21) | 119.379 | 118.019 |
|          |       |       | A(20-21-22) | 108.077 | 106.155 |
|          |       |       | A(20-21-23) | 114.756 | 114.635 |
|          |       |       | A(20-21-42) | 117.851 | 119.927 |
|          |       |       | A(22-21-23) | 106.683 | 106.133 |
|          |       |       | A(22-21-42) | 104.319 | 106.141 |
|          |       |       | A(23-21-42) | 104.188 | 102.867 |
|          |       |       | A(21-23-25) | 118.397 | 120.211 |
|          |       |       | A(21-42-31) | 104.591 | 104.526 |
|          |       |       | A(21-42-43) | 108.508 | 108.912 |
|          |       |       | A(32-31-41) | 101.481 | 101.185 |
|          |       |       | A(32-31-42) | 109.789 | 110.047 |
|          |       |       | A(41-31-42) | 118.021 | 121.756 |
|          |       |       | A(31-41-33) | 109.132 | 108.024 |
|          |       |       | A(31-41-39) | 131.335 | 132.659 |
|          |       |       | A(31-42-43) | 109.018 | 107.304 |
|          |       |       | A(34-33-41) | 122.455 | 123.088 |
|          |       |       | A(33-34-36) | 116.699 | 116.093 |
|          |       |       | A(33-41-39) | 119.439 | 119.116 |
|          |       |       | A(34-36-37) | 122.365 | 122.959 |
|          |       |       | A(36-37-39) | 119.479 | 119.404 |
|          |       |       | A(37-39-41) | 119.517 | 119.313 |
|          |       |       | A(45-44-56) | 132.363 | 134.390 |
|          |       |       | A(44-45-46) | 121.789 | 120.868 |
|          |       |       | A(44-45-54) | 119.414 | 119.744 |

|  |  |  |             |         |         |
|--|--|--|-------------|---------|---------|
|  |  |  | A(44-56-57) | 130.133 | 128.921 |
|  |  |  | A(46-45-54) | 118.794 | 119.323 |
|  |  |  | A(45-46-48) | 120.461 | 120.020 |
|  |  |  | A(45-54-52) | 120.592 | 120.406 |
|  |  |  | A(45-54-55) | 119.222 | 119.793 |
|  |  |  | A(46-48-50) | 120.299 | 120.479 |
|  |  |  | A(48-50-52) | 119.716 | 119.925 |
|  |  |  | A(50-52-54) | 120.137 | 119.821 |
|  |  |  | A(56-57-58) | 122.376 | 121.396 |
|  |  |  | A(56-57-66) | 118.976 | 119.465 |
|  |  |  | A(58-57-66) | 118.627 | 119.138 |
|  |  |  | A(57-58-60) | 120.504 | 120.478 |
|  |  |  | A(57-66-64) | 120.634 | 119.995 |
|  |  |  | A(57-66-67) | 118.735 | 120.009 |
|  |  |  | A(58-60-62) | 120.407 | 119.890 |
|  |  |  | A(60-62-64) | 119.524 | 120.072 |
|  |  |  | A(62-64-66) | 120.293 | 120.409 |

<sup>a</sup>Atom numbering refer to **Figure 1 (main text)**

**Table S2** The calculated natural charges of **4<sup>a</sup>**.

| Atom | Charge  | Atom | Charge  | Atom | Charge  |
|------|---------|------|---------|------|---------|
| Cl1  | -0.0040 | H24  | 0.2484  | H47  | 0.2485  |
| Cl2  | 0.0075  | C25  | -0.5828 | C48  | -0.2355 |
| S3   | 0.1929  | H26  | 0.2646  | H49  | 0.2438  |
| S4   | 0.3759  | H27  | 0.2531  | C50  | -0.2303 |
| O5   | -0.6032 | C28  | -0.3843 | H51  | 0.2420  |
| O6   | -0.5536 | H29  | 0.2562  | C52  | -0.2386 |
| N7   | -0.5147 | H30  | 0.2230  | H53  | 0.2438  |
| N8   | -0.6231 | C31  | 0.0659  | C54  | -0.2099 |
| N9   | -0.4406 | C32  | 0.7016  | H55  | 0.2513  |
| N10  | -0.4840 | C33  | 0.1890  | C56  | 0.1493  |
| C11  | -0.2221 | C34  | -0.2878 | C57  | -0.0824 |
| H12  | 0.2671  | H35  | 0.2625  | C58  | -0.2124 |
| C13  | -0.2407 | C36  | -0.0201 | H59  | 0.2468  |
| H14  | 0.2593  | C37  | -0.2685 | C60  | -0.2369 |
| C15  | -0.0398 | H38  | 0.2641  | H61  | 0.2408  |
| C16  | -0.2452 | C39  | -0.1912 | C62  | -0.2328 |
| H17  | 0.2581  | H40  | 0.2744  | H63  | 0.2395  |
| C18  | -0.2105 | C41  | -0.0965 | C64  | -0.2365 |
| H19  | 0.2432  | C42  | -0.2321 | H65  | 0.2409  |
| C20  | -0.0519 | C43  | 0.7303  | C66  | -0.2045 |
| C21  | -0.2688 | C44  | 0.1261  | H67  | 0.2570  |
| H22  | 0.2814  | C45  | -0.0980 | C68  | 0.2450  |

|     |         |     |         |     |        |
|-----|---------|-----|---------|-----|--------|
| C23 | -0.0596 | C46 | -0.1988 | H69 | 0.4481 |
|-----|---------|-----|---------|-----|--------|

<sup>a</sup>Atom numbering refer to **Figure 1 (main text)**

**Table S3** The calculated chemical shifts of 4<sup>a</sup>.

| Atom | Calc    | Exp.   | Atom | Calc. | Exp.  |
|------|---------|--------|------|-------|-------|
| C 11 | 119.340 | 129.46 | H 12 | 8.548 | 7.455 |
| C 13 | 117.341 | 129.34 | H 14 | 7.723 | 7.439 |
| C 15 | 130.884 | 134.70 | H 17 | 7.532 | 7.375 |
| C 16 | 116.241 | 124.93 | H 19 | 7.500 | 7.365 |
| C 18 | 120.290 | 131.52 | H 22 | 4.171 | 4.157 |
| C 20 | 126.323 | 134.58 | H 24 | 4.959 | 4.891 |
| C 21 | 51.339  | 46.83  | H 26 | 2.845 | 2.790 |
| C 23 | 65.688  | 56.23  | H 27 | 3.073 | 2.966 |
| C 25 | 30.787  | 14.18  | H 29 | 3.522 | 3.585 |
| C 28 | 41.121  | 32.85  | H 30 | 3.696 | 3.767 |
| C 31 | 69.558  | 71.04  | H 35 | 6.941 | 6.755 |
| C 32 | 162.241 | 176.31 | H 38 | 6.909 | 6.993 |
| C 33 | 131.664 | 137.28 | H 40 | 7.252 | 7.230 |
| C 34 | 99.108  | 82.42  | H 47 | 8.055 | 7.531 |
| C 36 | 134.008 | 143.45 | H 49 | 7.987 | 7.509 |
| C 37 | 110.797 | 111.72 | H 51 | 7.885 | 7.494 |
| C 39 | 116.117 | 120.82 | H 53 | 7.752 | 7.425 |
| C 41 | 110.492 | 111.72 | H 55 | 7.384 | 7.344 |
| C 42 | 85.062  | 82.42  | H 59 | 7.210 | 7.126 |
| C 43 | 158.635 | 168.69 | H 61 | 7.319 | 7.164 |
| C 44 | 117.063 | 128.44 | H 63 | 7.489 | 7.211 |
| C 45 | 116.993 | 128.36 | H 65 | 7.647 | 7.286 |
| C 46 | 120.519 | 130.68 | H 67 | 8.147 | 7.301 |
| C 48 | 115.748 | 127.27 | H 69 | 6.870 | 8.740 |
| C 50 | 116.703 | 127.42 |      |       |       |
| C 52 | 116.130 | 123.07 |      |       |       |
| C 54 | 118.637 | 128.66 |      |       |       |
| C 56 | 137.224 | 146.13 |      |       |       |
| C 57 | 121.113 | 131.99 |      |       |       |
| C 58 | 115.043 | 111.72 |      |       |       |
| C 60 | 114.795 | 127.27 |      |       |       |
| C 62 | 115.283 | 111.50 |      |       |       |
| C 64 | 115.887 | 111.72 |      |       |       |
| C 66 | 116.577 | 127.27 |      |       |       |
| C 68 | 142.660 | 149.86 |      |       |       |

<sup>a</sup>Atom numbering refer to **Figure 1 (main text)**.
